# Supplementary material for: Heterogeneous distribution of natural zinc isotopes in mice
Source: Royal Society of Chemistry journal article supplement (doi:10.1039/c3mt00008g), 2013-01-01
Supplement: c3mt00008g_5.pdf [file c3mt00008g_5.pdf]

## Supplementary Figure S2. Molecular structure of Zn-cysteine, and Zn-histidine species

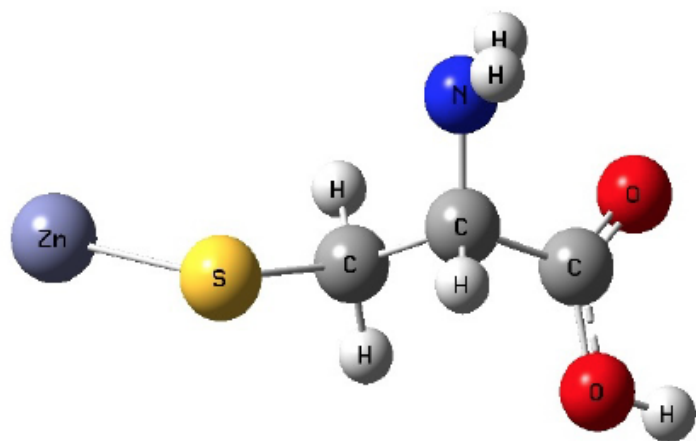

(a)  $[\text{Zn-Cys-H}^-]^{+}$

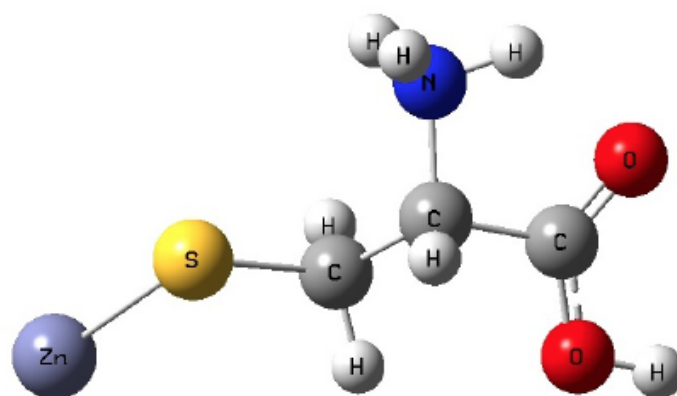

(b)  $[\text{Zn-Cys}]^{2+}$

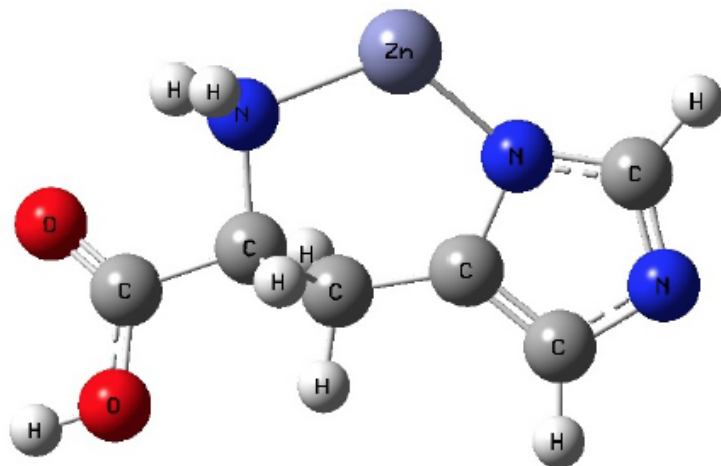

(c)  $[\text{Zn-His-H}^-]^{+}$

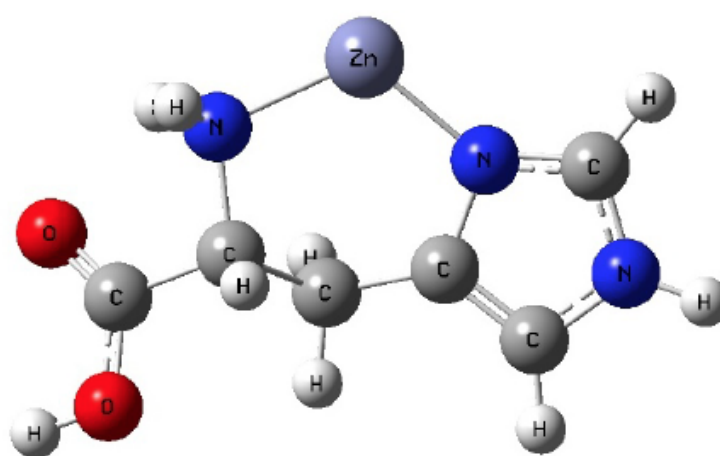

(d)  $[\text{Zn-His}]^{2+}$
