# Supplementary figures and images for: Heterogeneous distribution of natural zinc isotopes in mice
Source: Royal Society of Chemistry journal article supplement (doi:10.1039/c3mt00008g), 2013-01-01

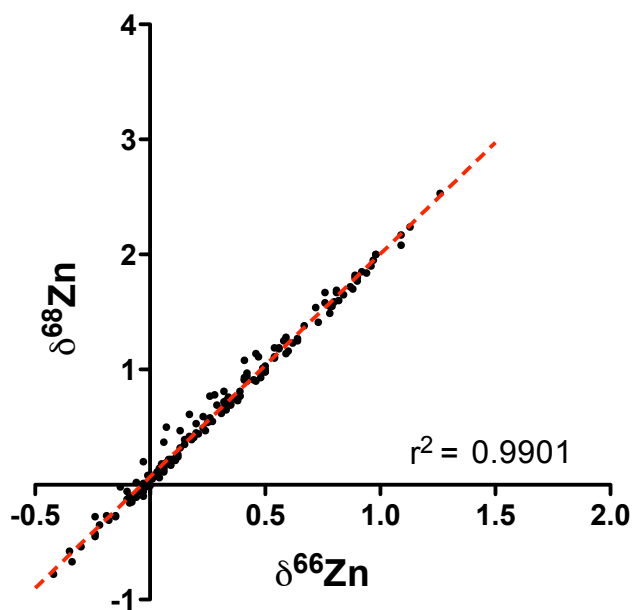

Supplementary Figure S1

Supplement: c3mt00008g_4.pdf [file c3mt00008g_4.pdf]
